# Supplementary material for: 2D-MoS2 nanosheets as effective hole transport materials for colloidal PbS quantum dot solar cells
Source: Royal Society of Chemistry journal article supplement (doi:10.1039/c8na00272j), 2019-01-01
Supplement: c8na00272j1.pdf [file c8na00272j1.pdf]

## Supporting Information

### **2D-MoS<sub>2</sub> nanosheets as effective hole transport materials for colloidal PbS quantum dot solar cells**

Srikanth Reddy Tulsani<sup>1,2</sup>, Arup K.Rath<sup>1,2</sup>, Dattatray J. Late<sup>1,2\*</sup>

<sup>1</sup>Physical and Materials Chemistry Division, CSIR-National Chemical Laboratory, Dr. Homi Bhabha Road, Pune, 411008, India.

<sup>2</sup>Academy of Scientific and Innovative Research (AcSIR), Ghaziabad- 201002, India

**Figure S1:**

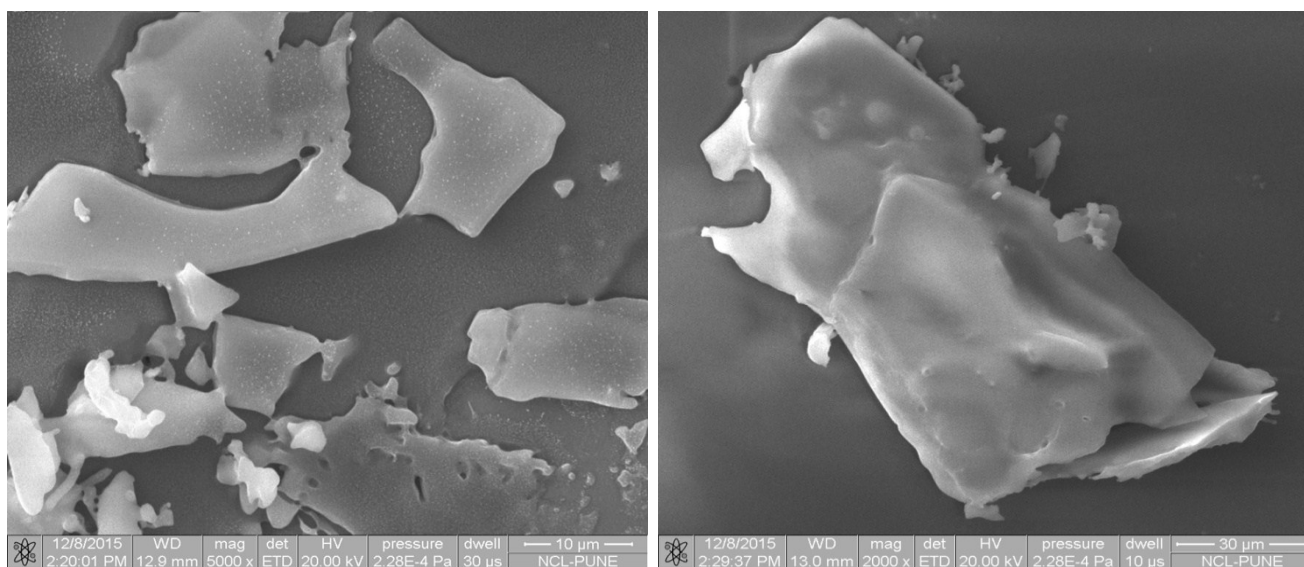

**Figure S1.** SEM images of MoS<sub>2</sub> nanosheets showing lateral dimension of the sheet between 10 to 100 µm

**Figure S2:**

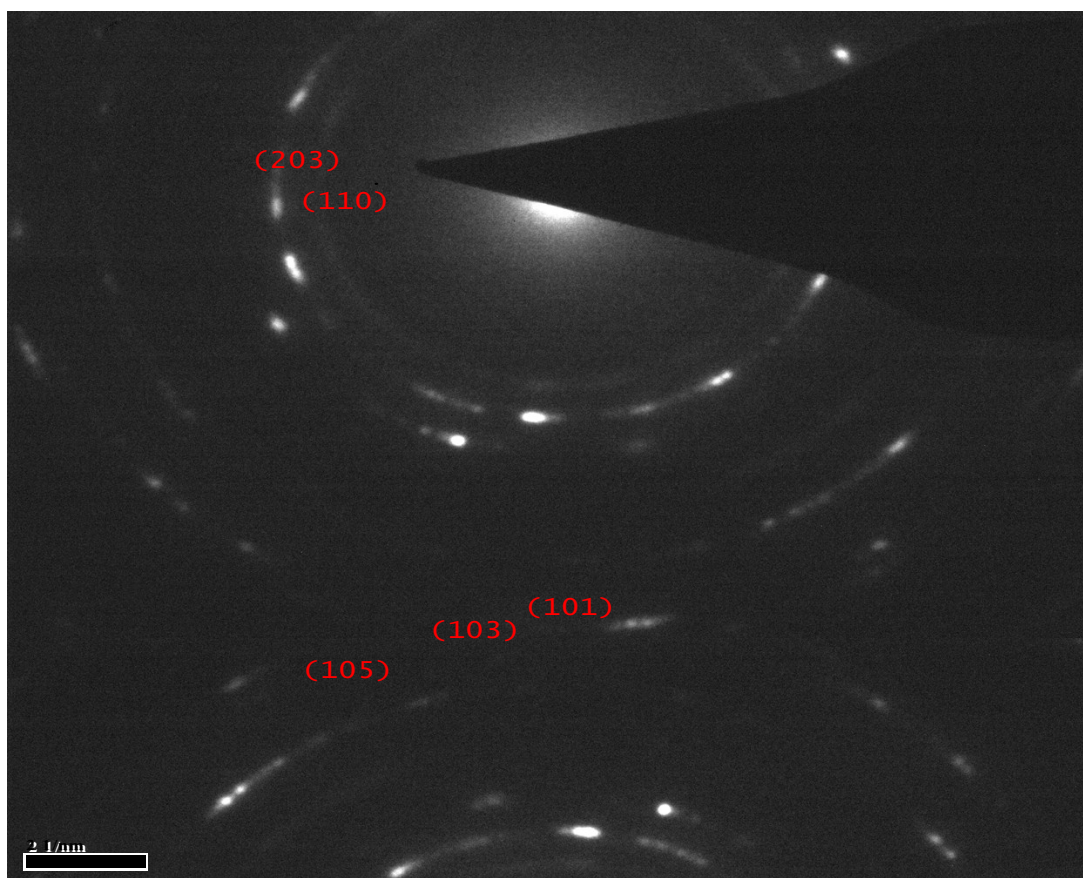

**Figure S2.** Typical SAED pattern of MoS<sub>2</sub> nanosheets.

**Figure S3:**

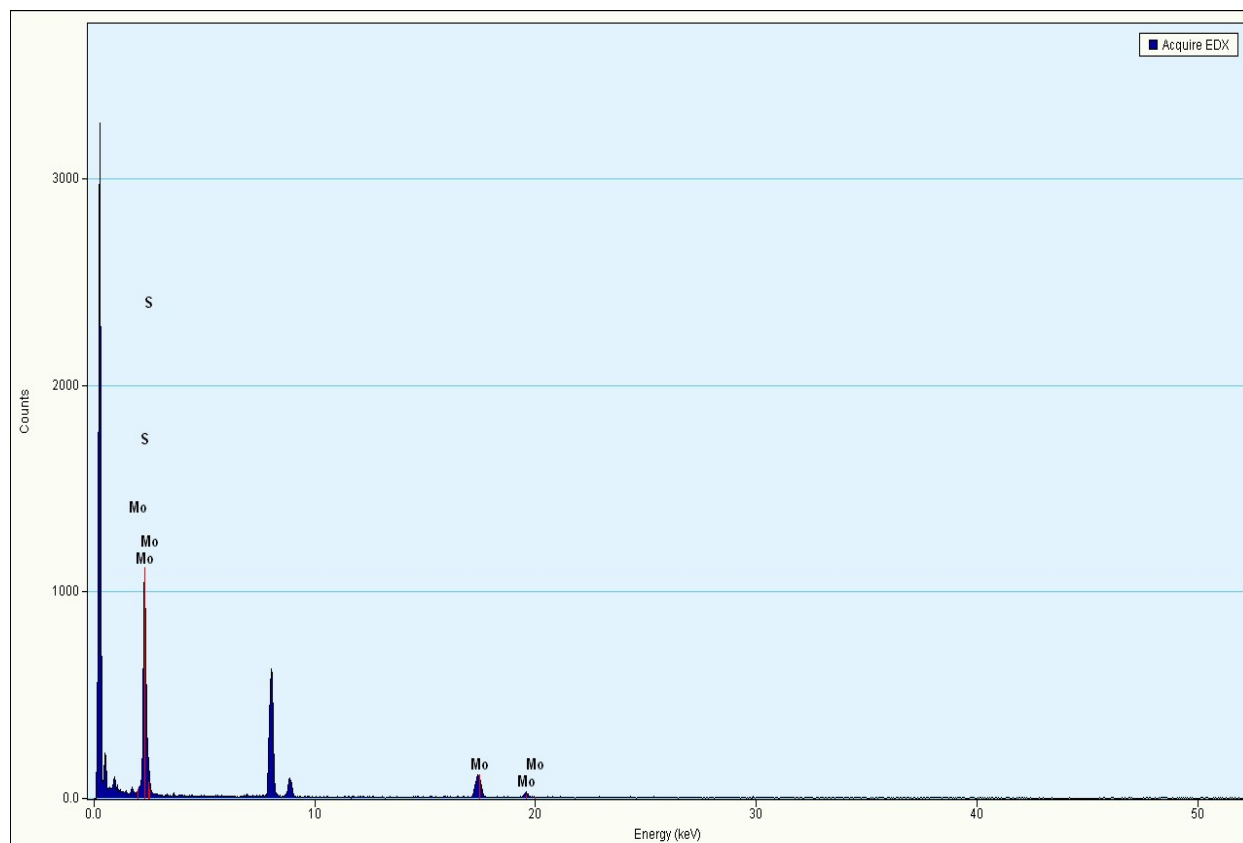

**Figure S3.** Energy Dispersive X-Ray Analysis (EDAX) of MoS<sub>2</sub> nanosheets.

**Figure S4:**

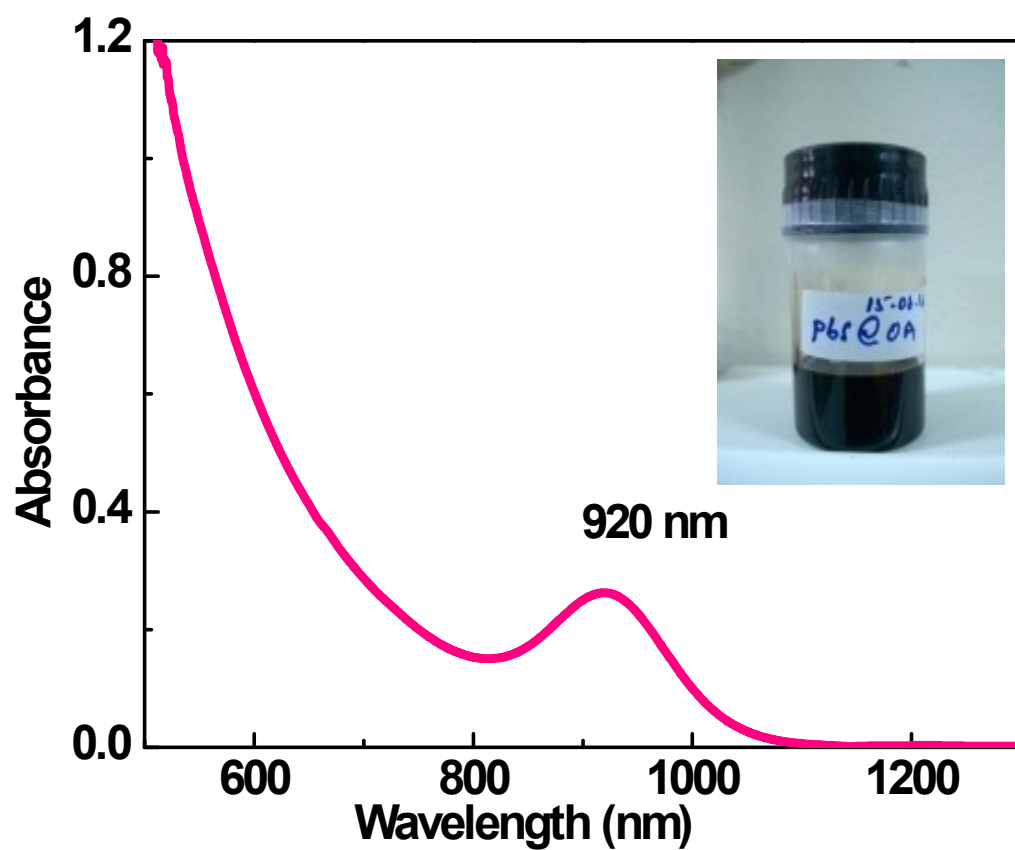

**Figure S4.** Absorption spectra of oleic acid capped PbS quantum dots; inset picture shows dispersed quantum dots in toluene.

**Figure S5:**

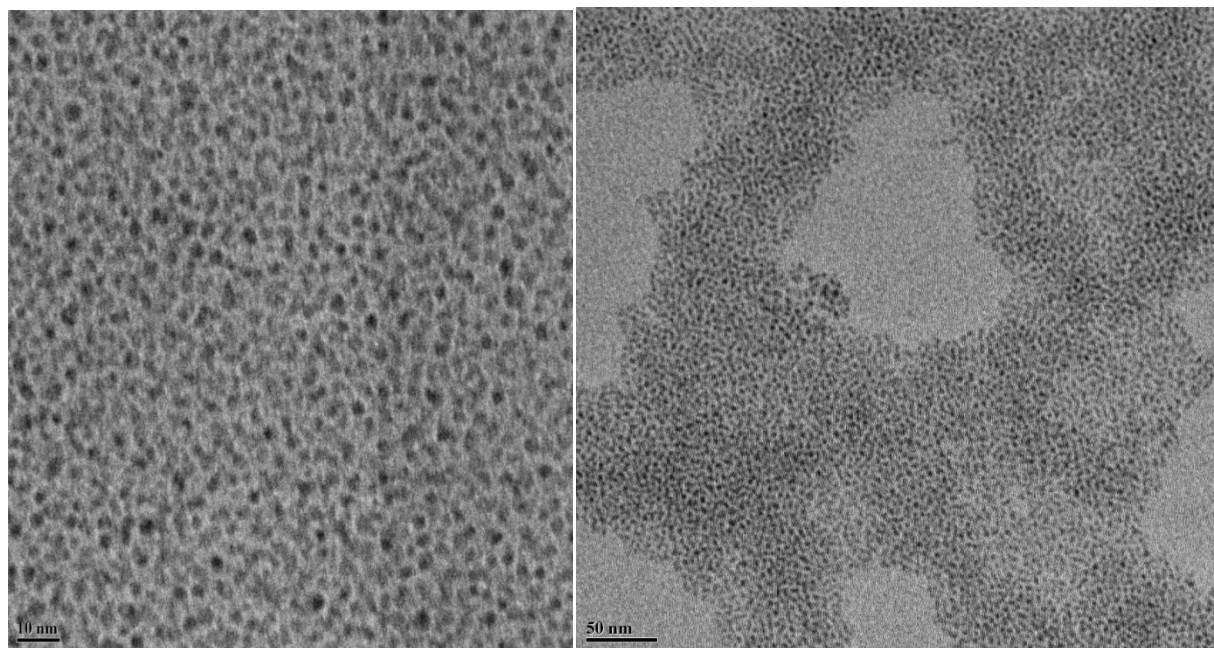

**Figure S5.** Typical TEM images of PbS quantum dots.
